# Supplementary material for: Discovery of biomarkers for glycaemic deterioration before and after the onset of type 2 diabetes: descriptive characteristics of the epidemiological studies within the IMI DIRECT Consortium
Source: Springer Nature journal article supplement (doi:10.1007/s00125-019-4906-1), 2019-06-15
Supplement: MOESM1 [file 16816106]

**ESM Table 1.**

|                                                                           |                                                                                    | Cohort 1 (Prediabetes) |            |           | Cohort 2 (Diabetes) |            |          |
|---------------------------------------------------------------------------|------------------------------------------------------------------------------------|------------------------|------------|-----------|---------------------|------------|----------|
|                                                                           |                                                                                    | NGR                    | IGR        | NGR/IGR   | LS                  | LS+MET     | NGR/IGR  |
|                                                                           |                                                                                    | Mean (SD)              | Mean (SD)  | N         | Mean (SD)           | Mean (SD)  | N        |
| Anthropometrics                                                           | Male, %                                                                            | 75%                    | 76%        | 693, 1419 | 58%                 | 56%        | 508, 271 |
|                                                                           | Months since previous visit                                                        | 6.8(4.9)               | 6.2(4.8)   | 693, 1419 | 0.8(1)              | 0.9(0.8)   | 507, 271 |
|                                                                           | Age, yrs                                                                           | 62(6.2)                | 62(6.2)    | 693, 1419 | 62(7.9)             | 61(8.3)    | 507, 271 |
|                                                                           | Height, cm                                                                         | 174(7.9)               | 174(8.1)   | 693, 1419 | 171(9.5)            | 171(10.2)  | 507, 271 |
|                                                                           | Weight, kg                                                                         | 83(12)                 | 86(14)     | 693, 1419 | 89(17)              | 89(17)     | 507, 271 |
|                                                                           | Waist circumference, cm                                                            | 97(10)                 | 101(11)    | 693, 1419 | 103(14)             | 104(13)    | 502, 270 |
|                                                                           | BMI, kg·m <sup>-2</sup>                                                            | 27.2(3.7)              | 28.3(4.1)  | 693, 1419 | 30.7(5.1)           | 30.3(4.8)  | 507, 271 |
|                                                                           | Systolic blood pressure, mmHg                                                      | 129(15)                | 132(15)    | 685, 1407 | 132(16)             | 129(14)    | 450, 211 |
| Diastolic blood pressure, mmHg                                            | 79(8.7)                                                                            | 81(9)                  | 685, 1407  | 75(9.6)   | 75(9.3)             | 450, 211   |          |
| Glycaemic Control                                                         | HbA1c, mmol/mol                                                                    | 35(2.2)                | 38(2.9)    | 693, 1419 | 46(5.7)             | 47(5.8)    | 508, 266 |
|                                                                           | HbA1c, %                                                                           | 5.4(0.2)               | 5.6(0.3)   | 693, 1419 | 6.4(0.5)            | 6.5(0.5)   | 508, 266 |
|                                                                           | Fasting glucose, mmol/l                                                            | 5.2(0.4)               | 5.9(0.5)   | 693, 1419 | 7(1.4)              | 7.5(1.5)   | 506, 271 |
|                                                                           | Fasting insulin, pmol/l                                                            | 60.3(36.3)             | 86.8(60.3) | 693, 1417 | 105.8(70.6)         | 108.1(72)  | 506, 271 |
|                                                                           | Fasting HDL cholesterol, mmol/l                                                    | 1.4(0.3)               | 1.3(0.4)   | 690, 1418 | 1.2(0.4)            | 1.2(0.4)   | 508, 271 |
|                                                                           | Fasting LDL cholesterol, mmol/l                                                    | 3.2(0.9)               | 3.2(0.9)   | 690, 1418 | 2.3(1)              | 2.3(0.9)   | 506, 266 |
|                                                                           | Fasting triglycerides, mmol/l                                                      | 1.2(0.5)               | 1.4(0.7)   | 690, 1418 | 1.5(0.8)            | 1.7(0.9)   | 508, 271 |
|                                                                           | Alanine aminotransferase, IU/l                                                     | 16(10)                 | 19(13)     | 690, 1415 | 25(12)              | 28(16)     | 508, 271 |
|                                                                           | Aspartate transaminase, IU/l                                                       | 26(9)                  | 28(11)     | 669, 1369 | 25(10)              | 27(14)     | 508, 271 |
|                                                                           | Total cholesterol, mmol/l                                                          | 5.1(1)                 | 5.1(1)     | 690, 1418 | 4.2(1.2)            | 4.3(1.1)   | 508, 271 |
|                                                                           | Fasting intact GLP-1 concentration (pg/ml)                                         | 0.37(0.45)             | 0.42(0.65) | 691, 1415 | 0.61(1.04)          | 0.77(1.06) | 505, 267 |
|                                                                           | Fasting total GLP-1 concentration, pg/ml                                           | 6.1(4.1)               | 6.7(4.5)   | 690, 1415 | 9(7.6)              | 10.1(11.2) | 502, 268 |
|                                                                           | Fasting glucagon, pg/ml                                                            | 96(33)                 | 100(44)    | 690, 1411 | 112(56)             | 109(38)    | 488, 261 |
|                                                                           | 1h intact proinsulin, pg/ml                                                        | 15(7.4)                | 20(12.7)   | 145, 430  | 22(14)              | 20(12.9)   | 251, 128 |
|                                                                           | 1h GLP-1 increment, pg/ml                                                          | 9.4(11.4)              | 9.3(12.4)  | 687, 1401 | 9.9(14)             | 9.4(8.9)   | 497, 267 |
|                                                                           | 1h glucagon increment, pg/ml                                                       | -9.5(52)               | -11.3(29)  | 684, 1398 | -4.8(58)            | -1.9(37)   | 479, 259 |
|                                                                           | Mean 2-hr glucose, mmol/ml                                                         | 6.8(1.1)               | 8.2(1.4)   | 692, 1419 | 8.9(1.9)            | 10.1(2.1)  | 503, 267 |
|                                                                           | Mean 2-hr insulin, pmol/ml                                                         | 314(203)               | 418(279)   | 692, 1419 | 469(289)            | 433(244)   | 503, 267 |
|                                                                           | 2-hr glucose, mmol/ml                                                              | 5.3(1.2)               | 6.2(1.8)   | 693, 1419 | 8.2(2.7)            | 9.5(2.9)   | 505, 271 |
|                                                                           | 2-hr insulin, pmol/ml                                                              | 35(31)                 | 55(53)     | 682, 1405 | 455(347)            | 428(352)   | 505, 271 |
|                                                                           | Fasting insulin secretion, pmol min <sup>-1</sup> m <sup>-2</sup>                  | 90(30)                 | 114(42)    | 692, 1419 | 134(48)             | 141(48)    | 503, 267 |
|                                                                           | Integral of total insulin secretion, nmol/m <sup>2</sup>                           | 47(15)                 | 55(18)     | 692, 1419 | 44(15)              | 44(13)     | 503, 267 |
|                                                                           | Glucose sensitivity, pmol min <sup>-1</sup> m <sup>-2</sup> (mmol/l) <sup>-1</sup> | 124(62)                | 107(51)    | 692, 1419 | 90(57)              | 72(50)     | 503, 267 |
|                                                                           | Rate sensitivity, pmol m <sup>-2</sup> (mmol/l) <sup>-1</sup>                      | 1003(768)              | 880(658)   | 692, 1419 | 1122(1119)          | 1130(1018) | 503, 267 |
|                                                                           | Potentiation factor ratio, dimensionless,                                          | 1.8(0.6)               | 1.7(0.6)   | 692, 1419 | 1.5(0.7)            | 1.3(0.4)   | 501, 267 |
|                                                                           | Insulin sensitivity (2-h OGIS), ml min <sup>-1</sup> m <sup>-2</sup>               | 417(49)                | 362(56)    | 689, 1414 | 303(74)             | 288(60)    | 500, 266 |
| Stumvoll insulin sensitivity index, ml min <sup>-1</sup> kg <sup>-1</sup> | 8.7(1.7)                                                                           | 7.4(2.6)               | 681, 1403  | 5.6(2.8)  | 5.4(2.6)            | 500, 266   |          |
| Matsuda insulin sensitivity index, arbitrary units                        | 6.5(3.6)                                                                           | 4.3(2.5)               | 692, 1419  | 3(2.3)    | 2.7(1.9)            | 503, 267   |          |
| Magnetic Resonance Imaging                                                | Intrabdominal Adipose Tissue, l                                                    | 5.1(2.3)               | 5.6(2.4)   | 274, 674  | 6(2.2)              | 5.2(2.1)   | 247, 122 |
|                                                                           | Abdominal Subcutaneous Adipose Tissue, l                                           | 5.5(2.3)               | 6.3(2.7)   | 273, 672  | 8.1(3.7)            | 7.9(3.9)   | 247, 122 |
|                                                                           | Total Abdominal Adipose Tissue, l                                                  | 11(3.6)                | 12(4)      | 273, 672  | 14(4.7)             | 13(4.9)    | 247, 122 |
|                                                                           | Liver Fat, %                                                                       | 3.8(3.6)               | 5.5(5)     | 276, 675  | 8.2(6.6)            | 9.9(8)     | 340, 153 |
|                                                                           | Pancreatic Fat, %                                                                  | 14(8.8)                | 13(9)      | 262, 660  | 11(6.7)             | 11(8.2)    | 307, 136 |
|                                                                           | Liver Iron content, mg/g tissue                                                    | 1.3(0.31)              | 1.3(0.24)  | 276, 674  | 1.4(0.28)           | 1.4(0.35)  | 340, 153 |
| Pancreatic Iron content, mg/g tissue                                      | 1.3(0.63)                                                                          | 1.3(0.31)              | 262, 658   | 1.2(0.33) | 1.2(0.31)           | 306, 138   |          |
| Physical Activity                                                         | Average physical activity intensity – hpfVM, mgs                                   | 38(10.5)               | 37(10)     | 561, 1140 | 35(10.1)            | 33(9.4)    | 465, 248 |
|                                                                           | Sedentary physical activity, % of time                                             | 82(4.4)                | 82(4.1)    | 561, 1140 | 83(4.4)             | 84(4.1)    | 465, 248 |
|                                                                           | Light physical activity, % of time                                                 | 10.9(2.4)              | 10.8(2.2)  | 561, 1140 | 10.6(2.4)           | 10.1(2.2)  | 465, 248 |
|                                                                           | Moderate physical activity, % of time                                              | 5.3(1.6)               | 5.2(1.5)   | 561, 1140 | 5(1.6)              | 4.7(1.5)   | 465, 248 |
|                                                                           | Vigorous physical activity, % of time                                              | 1.6(0.8)               | 1.5(0.7)   | 561, 1140 | 1.4(0.7)            | 1.2(0.6)   | 465, 248 |
| Diet                                                                      | Total energy intake, kJ/day                                                        | 8259(3025)             | 8209(3201) | 670, 1380 | 7636(2510)          | 7803(2548) | 474, 224 |
|                                                                           | Carbohydrate intake, g/day                                                         | 227(95)                | 221(97)    | 670, 1380 | 212(80)             | 215(73)    | 474, 224 |
|                                                                           | Fat intake, g/day                                                                  | 79(38)                 | 79(39)     | 670, 1380 | 71(32)              | 74(35)     | 474, 224 |
|                                                                           | Protein intake, g/day                                                              | 98(43)                 | 99(45)     | 670, 1380 | 86(29)              | 89(35)     | 474, 224 |
|                                                                           | Sugar intake, g/day                                                                | 100(53)                | 95(54)     | 670, 1380 | 84(42)              | 87(45)     | 474, 224 |
|                                                                           | Fibre intake, g/day                                                                | 21(10.1)               | 20(9.6)    | 670, 1380 | 20(8.9)             | 18(7.2)    | 474, 224 |
|                                                                           | Saturated fat intake, g/day                                                        | 29(16)                 | 30(17)     | 670, 1380 | 25(14)              | 28(14)     | 474, 224 |
|                                                                           | Monounsaturated fat intake, g/day                                                  | 28(18)                 | 27(16)     | 670, 1380 | 24(12)              | 25(13)     | 474, 224 |
|                                                                           | Polyunsaturated fat intake, g/day                                                  | 13(8.6)                | 13(8.1)    | 670, 1380 | 12(7.6)             | 12(8.7)    | 474, 224 |

**ESM Table 1.** Baseline clinical and phenotypic characteristics of Cohorts 1 and 2 by glycaemic control and treatment status. IGR: Impaired glucose regulation, NGR: Normal glucose regulation, LS: Lifestyle Treatment, LS+MET: Lifestyle and metformin treatment. Descriptive statistics shown are N, % or mean (standard deviation) as indicated. Values are untransformed and unadjusted. Data presented reflects the data available at the time of publication.
